# Supplementary material
Source: publisher figshare collection journal article supplement (https://gsajournals.figshare.com/articles/dataset/_/9738875)
Supplement: Supplementary file 1 [file 1]

Table S1: **Medians and 95% posteriors for parameter estimation in intra-macaque Simian-HIV populations.**

|                          | $c$ | $m$                         | $M^1$               | $s$                   | $N\mu$                 |
|--------------------------|-----|-----------------------------|---------------------|-----------------------|------------------------|
| Plasma v Gut             | 1   | 1.03e-3<br>(5e-5,0.291)     | 101<br>(4.9,28600)  | 1.5<br>(0.71,5.31)    | 0.98<br>(0.559,1.94)   |
| Plasma v LN <sup>1</sup> |     | 2.67e-2<br>(2.85e-3,0.448)  | 2460<br>(262,41200) | 0.949<br>(0.604,5.01) | 0.92<br>(0.51,2.14)    |
| Plasma v Gut             | 2   | 5.28e-4<br>(2.06e-5,0.0326) | 15.5<br>(0.602,953) | 3<br>(0.987,27.7)     | 0.293<br>(0.122,0.744) |
| Plasma v LN              |     | 0.0271<br>(1.09e-3,0.444)   | 573<br>(23,9400)    | 1.24<br>(0.783,3.19)  | 0.212<br>(0.11,0.44)   |
| Plasma v Gut             | 5   | 5.37e-4<br>(1.84e-5,0.0145) | 8.05<br>(0.276,218) | 1.75<br>(1,15.8)      | 0.15<br>(0.103,0.296)  |
| Plasma v LN              |     | 4.13e-2<br>(1.03e-3,0.447)  | 574<br>(14.4,6220)  | 1.52<br>(0.849,14.9)  | 0.139<br>(0.101,0.29)  |

<sup>1</sup> $M$  is a composite estimate taken from multiplying the  $m$  distribution by the point estimate of predicted population size derived from the estimated  $N\mu$  ( $M = m \times (N\mu)/\mu$ ).
