# Supplementary material
Source: publisher figshare collection journal article supplement (https://gsajournals.figshare.com/articles/dataset/_/9738875)
Supplement: Supplementary file 3 [file 1]

# 1 Expanded derivations for Feder et al, 2019

Here we show an extended derivation of  $F_{ST}(t)$  (equation 3). Since  $F_{ST} = \frac{h_b - h_w}{h_b}$ , we need to determine the heterozygosities in our simplified model both within and between subpopulations. There are three alleles to consider with reference to a focal subpopulation: the locally derived allele, which is at frequency  $f(t)F(t)$ , the non-locally derived allele, which is at frequency  $f(t)(1 - F(t))$  and the wildtype allele, which is at frequency  $1 - f(t)$ . Because the compartments are symmetric, it is sufficient to determine the within-subpopulation heterozygosity in the focal compartment:

$$h_w = 1 - [f(t)F(t)]^2 - [f(t)(1 - f(t))]^2 - (1 - f(t))^2.$$

To determine the between subpopulation heterozygosity, we take advantage of symmetries in the allele frequencies. Allele  $A$  (local to population  $A$ ), is at frequency  $f_l(t)$  in subpopulation  $A$  and at frequency  $f_{nl}(t)$  in subpopulation  $B$ . Similarly, allele  $B$  (local to population  $B$ ) is at frequency  $f_{nl}(t)$  in subpopulation  $A$  and at frequency  $f_l(t)$  in subpopulation  $B$ . The wildtype allele is at the same frequency  $1 - f(t)$  across both subpopulations. Therefore,

$$h_b = 1 - 2f(t)F(t) \times f(t)[1 - F(t)] - (1 - f(t))^2.$$

Therefore, the numerator of  $F_{ST}(t)$  is given as follows:

$$h_b - h_w = f(t)^2[1 - 2F(t)]^2 \quad (S1)$$

and the denominator of  $F_{ST}(t)$  is:

$$h_b = f(t)[2 - 2F(t)(1 - F(t))f(t) - f(t)]. \quad (S2)$$

Combining equations S1 and S2, we see equation 3:

$$F_{ST}(t) = \frac{(1 - 2F(t))^2 f(t)}{2 - 2f(t)F(t)(1 - F(t)) - f(t)}.$$

To determine  $t_{max}$ , we take the derivative of  $F_{ST}(t)$  with respect to time  $t$ , and assume that at  $t = 0$ ,  $F(0) = 0$  (the non-local allele is initially not present in the population), and  $f(0) = 1/N$  (the frequency of the local allele is at a single copy). Under these conditions, we observe the following simplifications:

$$\begin{aligned} F(t) &= 0.5 \times (1 - e^{-2mt}) \\ f(t) &= \frac{e^{st}}{e^{st} + N - 1}. \end{aligned} \quad (S3)$$

Differentiating  $F_{ST}(t)$  with respect to time can be done in the program Mathematica, although the closed form is not instructive:

```
> f[t_] := Exp[s*t]/( Exp[s*t] + N - 1 )
> F[t_] := 0.5 + -0.5 * Exp[-2*m*t]
> Fst[t_] := (1 - 2*F[t])^2 * f[t]/
  ( 2 - 2*f[t] * F[t] * (1 - F[t]) - f[t])
> Solve[Fst'[t] == 0, t]
```

Solving the derivative for 0 results in the form  $t_{max} = \frac{1}{s} \log((\frac{s}{m} - 4)(N - 1))$  (equation 4). Plugging  $t_{max}$  back into equation 3 results in  $F_{ST}(t_{max})$  (equation 5).
